# Supplementary material
Source: publisher figshare collection journal article supplement (https://gsajournals.figshare.com/articles/dataset/_/12911426)
Supplement: Supplementary file 1 [file 1]

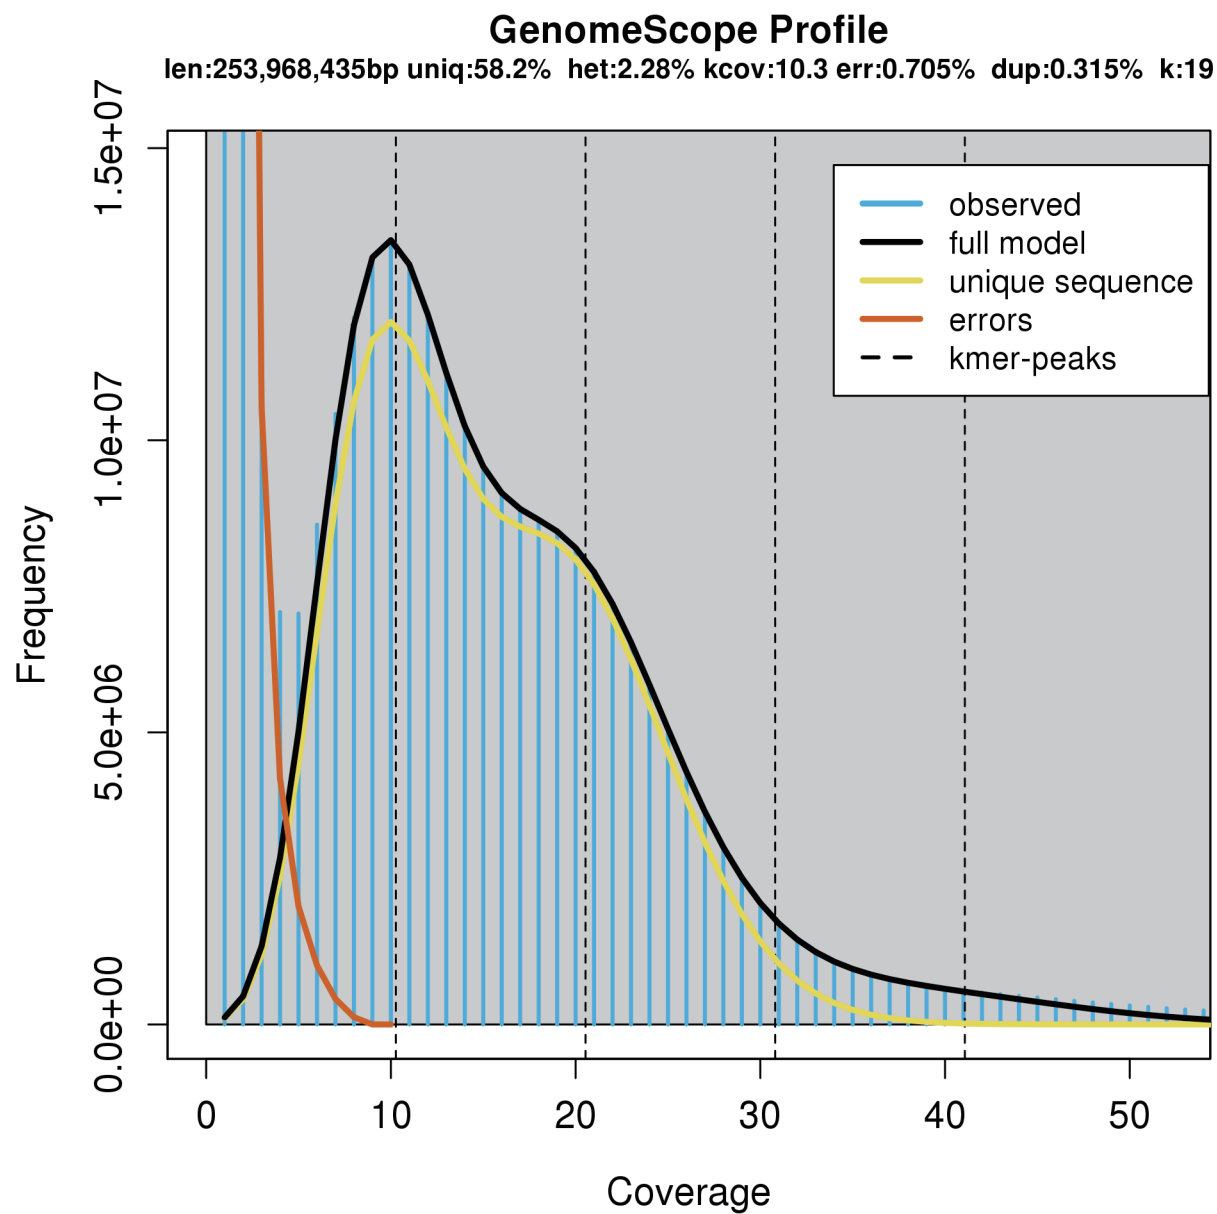

**Figure S1. k-mer frequency distribution plots in *Hydra viridissima* A99 genome sequence.**

Plots was generated by GenomeScope software by k-mer based statistical approach using Illumina paired-end sequence reads.
