# Supplementary material
Source: publisher figshare collection journal article supplement (https://gsajournals.figshare.com/articles/dataset/_/12911426)
Supplement: Supplementary file 3 [file 1]

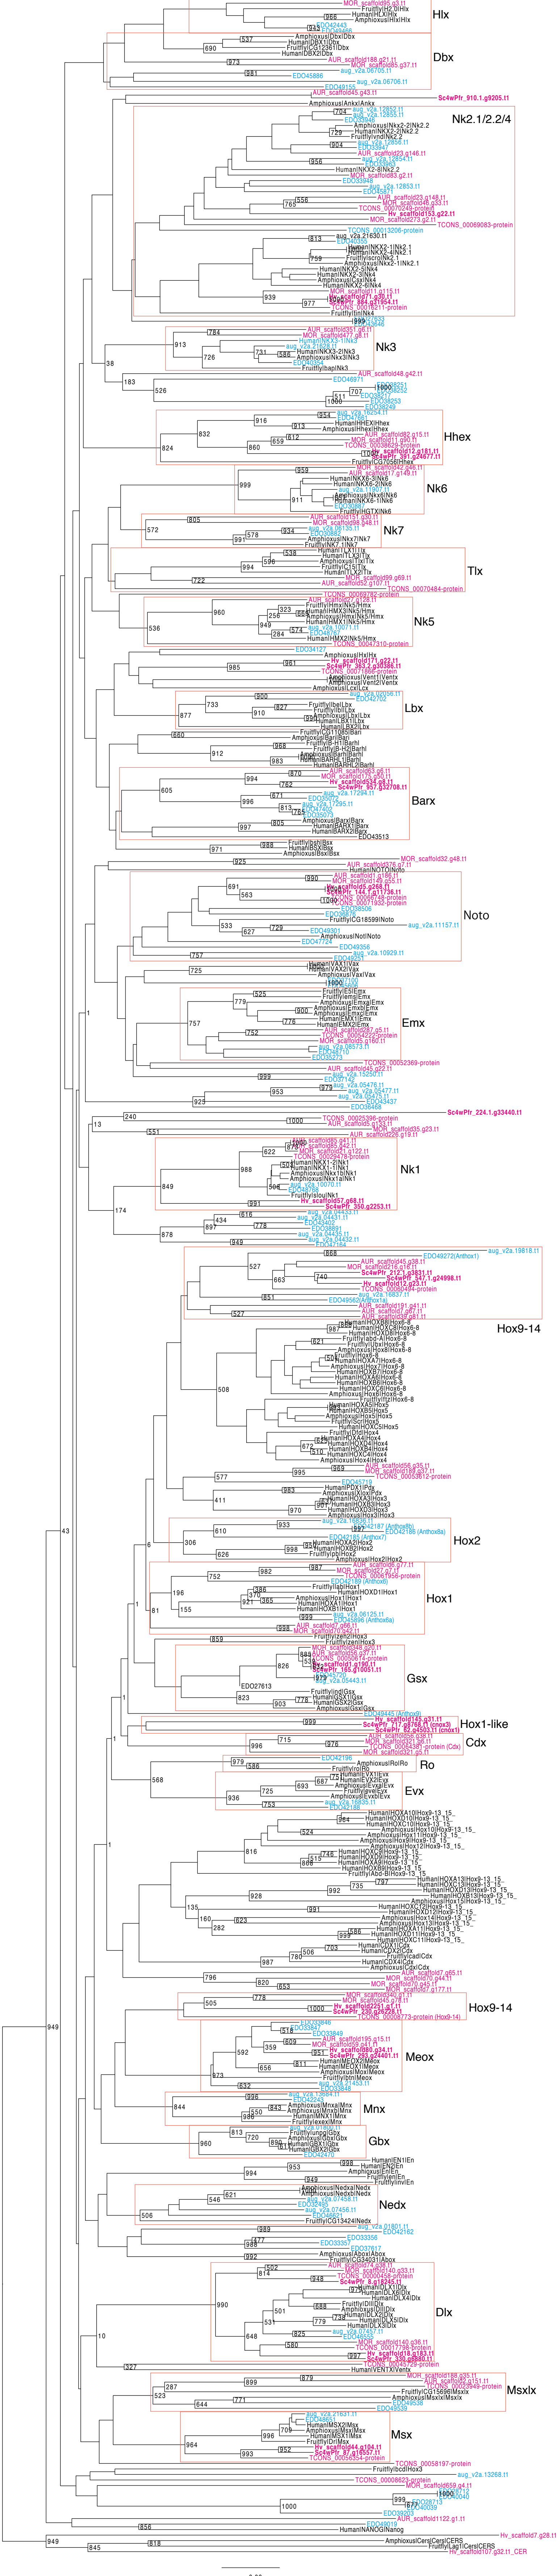

**Figure S2. Phylogenetic analysis of ANTP genes.**  
 Phylogenetic relationships were inferred by NJ method with 1000 bootstrap replicates based on the 60 amino acid homeodomains. Bootstrap values >400 are shown. Gene IDs shown in magenta: medusozoans, blue: anthozoans, bold: *Hydra*. Headers in gene ID, Hvx; *Hydra viridissima* A99, *Sc4wPfr*; *Hydra vulgaris* meduzo.0, TCONS; *Clytia hemisphaerica*, AUR; *Aurelia aurita*, MOR; *Morbakka virulenta*, EDO; *Medustostella vectensis*, aug; *Acropora digitifera*. Classifications (orange column) are based on the ANTP genes previously identified in bilaterians (Human, Fruitfly and Amphioxus) and cnidarians.
